# Supplementary material for: Single and double crown macrocyclic derivatives of cyclotriphosphazene as receptors of silver(i) ions
Source: Royal Society of Chemistry journal article supplement (doi:10.1039/c5ra02469b), 2015-01-01
Supplement: c5ra02469b1.pdf [file c5ra02469b1.pdf]

## Supplementary Information

### Single and double crown macrocyclic derivatives of cyclotriphosphazene as receptors of silver (I) ions

5 Natalia Gutowska<sup>a\*</sup>, Piotr Seliger<sup>a</sup>, Grzegorz Andrijewski<sup>a</sup>, Mariola Siwy<sup>b</sup> Magdalena Malecka<sup>c</sup>,  
Joachim Kusz<sup>d</sup>.

<sup>a</sup> Department of Inorganic and Analytical Chemistry, Faculty of Chemistry, University of Lodz, 91-403 Łódź, Tamka 12, Poland

<sup>b</sup> Polish Academy of Sciences, Centre of Polymer and Carbon Materials, 41-800 Zabrze, Marii Curie-Skłodowskiej 34, Poland

10 <sup>c</sup> Department of Theoretical and Structural Chemistry, Faculty of Chemistry, University of Lodz, Pomorska 163/165, 90-236 Lodz, Poland, <sup>d</sup> Institute of Physics, University of Silesia, Uniwersytecka 4, 40-007 Katowice, Poland

\*E-mail: natalia\_gutowska@wp.pl

15 **Table S1.** Crystallographic data for compound L2.

| compound L2                                          |                                                                               |
|------------------------------------------------------|-------------------------------------------------------------------------------|
| Empirical formula                                    | C <sub>26</sub> H <sub>52</sub> N <sub>5</sub> O <sub>10</sub> P <sub>3</sub> |
| Molecular weight                                     | 687.63                                                                        |
| Size (mm)                                            | 0.08 × 0.11 × 0.12                                                            |
| Crystal system                                       | orthorhombic                                                                  |
| Space group                                          | P21212                                                                        |
| a[Å]                                                 | 12.4915(2)                                                                    |
| b[Å]                                                 | 13.3518(2)                                                                    |
| c[Å]                                                 | 9.9705(1)                                                                     |
| V[Å <sup>3</sup> ]                                   | 1662.92(4)                                                                    |
| Z/ d <sub>x</sub> [g cm <sup>-3</sup> ]              | 2/1.373                                                                       |
| μ[cm <sup>-1</sup> ]                                 | 0.239                                                                         |
| λ[Å]                                                 | 0.71073                                                                       |
| max θ[°]                                             | 25.425                                                                        |
| No. of measured reflections                          | 27358                                                                         |
| No. of unique reflections                            | 8948                                                                          |
| R <sub>(int)</sub>                                   | 0.0234                                                                        |
| No. of observed reflns (I>2 σ(I))                    | 8348                                                                          |
| Data/restraints/parameters                           | 8948/0/200                                                                    |
| R <sub>1</sub> (obsd data)                           | 0.0273                                                                        |
| R <sub>1</sub> (all data)                            | 0.0317                                                                        |
| Goodness-of-fit on F <sup>2</sup>                    | 1.11                                                                          |
| largest difference peak and hole [e/Å <sup>3</sup> ] | 0.485/-0.434                                                                  |

**Table S2.** The values of stepwise stability constants taken from the previous paper<sup>19</sup>.

| Complex form                                                         | TetrapyrrolidinyI-PNP-lariat ether |                       | Tetramorpholinyl-PNP-lariat ether |                       |
|----------------------------------------------------------------------|------------------------------------|-----------------------|-----------------------------------|-----------------------|
|                                                                      | log β in methanol                  | log β in acetonitrile | log β in methanol                 | log β in acetonitrile |
| Ag <sup>+</sup> + L → AgL <sup>+</sup>                               | 4.38 ± 0.01                        | 2.73 ± 0.01           | 3.20 ± 0.02                       | 1.88 ± 0.01           |
| AgL <sup>+</sup> + L → AgL <sub>2</sub> <sup>+</sup>                 | 3.14 ± 0.03                        | 3.62 ± 0.01           | 3.38 ± 0.04                       | 2.90 ± 0.01           |
| AgL <sup>+</sup> + Ag <sup>+</sup> → Ag <sub>2</sub> L <sup>2+</sup> | 2.71 ± 0.02                        | 2.07 ± 0.02           | -                                 | -                     |

**Table S3.**  $^1\text{H}$  NMR and  $^{13}\text{C}$  NMR data in  $\text{CD}_3\text{OD}$  and  $\text{CD}_3\text{CN}$  for uncomplexed ligand **L1** – and after adding silver ion with the Ag:L molar ratio 0.5:1, 1:1 and 2:1

|                                       | Methanol                              |                                       | Acetonitrile                          |                     |
|---------------------------------------|---------------------------------------|---------------------------------------|---------------------------------------|---------------------|
|                                       | $^1\text{H}$ NMR                      | $^{13}\text{C}$ NMR                   | $^1\text{H}$ NMR                      | $^{13}\text{C}$ NMR |
| <b>L1</b>                             | 4.01 (2H, $\text{CH}_2\text{OP}$ , m) | 65.3                                  | 3.90 (2H, $\text{CH}_2\text{OP}$ , m) | 64.7                |
|                                       | 3.94(2H, $\text{CH}_2\text{OP}$ , m)  | 65.3                                  | 3.81(2H, $\text{CH}_2\text{OP}$ , m)  | 64.7                |
|                                       | 3.71 (2H, $\text{CH}_2\text{C}$ , m)  | 71.2                                  | 3.62 (2H, $\text{CH}_2\text{C}$ , m)  | 70.9                |
|                                       | 3.65 (6H, $\text{CH}_2\text{C}$ , m)  | 71.8                                  | 3.58 (6H, $\text{CH}_2\text{C}$ , m)  | 71.4                |
|                                       | 3.60 (4H, $\text{CH}_2\text{C}$ , m)  | 71.7                                  | 3.55 (4H, $\text{CH}_2\text{C}$ , m)  | 71.3                |
|                                       | 3.07 (16H, $\text{CH}_2\text{N}$ , m) | 46.6                                  | 2.98 (16H, $\text{CH}_2\text{N}$ , m) | 46.1                |
|                                       | 1.57 (8H, $\text{CH}_2\text{C}$ , m)  | 25.9                                  | 1.53 (8H, $\text{CH}_2\text{C}$ , m)  | 25.8                |
|                                       | 1.53 (16H, $\text{CH}_2\text{C}$ , m) | 27.3                                  | 1.47 (16H, $\text{CH}_2\text{C}$ , m) | 27.2                |
| <b>L1 + 0.5 Ag</b>                    | 4.08 (2H, $\text{CH}_2\text{OP}$ , m) | 66.1                                  | 3.97 (2H, $\text{CH}_2\text{OP}$ , m) | 65.5                |
|                                       | 3.99 (2H, $\text{CH}_2\text{OP}$ , m) | 66.1                                  | 3.90(2H, $\text{CH}_2\text{OP}$ , m)  | 65.5                |
|                                       | 3.76 (2H, $\text{CH}_2\text{C}$ , m)  | 71.3                                  | 3.66 (2H, $\text{CH}_2\text{C}$ , m)  | 70.8                |
|                                       | 3.67 (6H, $\text{CH}_2\text{C}$ , m)  | 71.4                                  | 3.58 (6H, $\text{CH}_2\text{C}$ , m)  | 71.3                |
|                                       | 3.63 (4H, $\text{CH}_2\text{C}$ , m)  | 71.4                                  | 3.55 (4H, $\text{CH}_2\text{C}$ , m)  | 71.2                |
|                                       | 3.11 (16H, $\text{CH}_2\text{N}$ , m) | 46.7                                  | 3.04 (16H, $\text{CH}_2\text{N}$ , m) | 46.3                |
|                                       | 1.60 (8H, $\text{CH}_2\text{C}$ , m)  | 25.9                                  | 1.55 (8H, $\text{CH}_2\text{C}$ , m)  | 25.6                |
|                                       | 1.56 (16H, $\text{CH}_2\text{C}$ , m) | 27.3                                  | 1.50 (16H, $\text{CH}_2\text{C}$ , m) | 27.1                |
| <b>L1 + 1 Ag</b>                      | 4.15 (2H, $\text{CH}_2\text{OP}$ , m) | 66.6                                  | 4.00 (2H, $\text{CH}_2\text{OP}$ , m) | 65.8                |
|                                       | 4.00(2H, $\text{CH}_2\text{OP}$ , m)  | 66.6                                  | 3.93(2H, $\text{CH}_2\text{OP}$ , m)  | 65.8                |
|                                       | 3.81 (2H, $\text{CH}_2\text{C}$ , m)  | 71.0                                  | 3.68 (2H, $\text{CH}_2\text{C}$ , m)  | 70.7                |
|                                       | 3.71 (6H, $\text{CH}_2\text{C}$ , m)  | 70.5                                  | 3.58 (6H, $\text{CH}_2\text{C}$ , m)  | 71.2                |
|                                       | 3.67 (4H, $\text{CH}_2\text{C}$ , m)  | 70.2                                  | 3.55 (4H, $\text{CH}_2\text{C}$ , m)  | 70.9                |
|                                       | 3.14 (8H, $\text{CH}_2\text{N}$ , m)  | 46.8                                  | 3.05 (16H, $\text{CH}_2\text{N}$ , m) | 46.3                |
|                                       | 3.09 (8H, $\text{CH}_2\text{N}$ , m)  | 46.6                                  |                                       | 25.5                |
|                                       | 1.61 (8H, $\text{CH}_2\text{C}$ , m)  | 25.8                                  | 1.56 (8H, $\text{CH}_2\text{C}$ , m)  | 27.0                |
| 1.56 (16H, $\text{CH}_2\text{C}$ , m) | 27.3                                  | 1.51 (16H, $\text{CH}_2\text{C}$ , m) |                                       |                     |
| <b>L1 + 2 Ag</b>                      | 4.22 (2H, $\text{CH}_2\text{OP}$ , m) | 67.0                                  | 4.02 (2H, $\text{CH}_2\text{OP}$ , m) | 65.9                |
|                                       | 4.06(2H, $\text{CH}_2\text{OP}$ , m)  | 67.0                                  | 3.93(2H, $\text{CH}_2\text{OP}$ , m)  | 65.9                |
|                                       | 3.85 (2H, $\text{CH}_2\text{C}$ , m)  | 70.8                                  | 3.69 (2H, $\text{CH}_2\text{C}$ , m)  | 70.6                |
|                                       | 3.75 (6H, $\text{CH}_2\text{C}$ , m)  | 69.4                                  | 3.59 (6H, $\text{CH}_2\text{C}$ , m)  | 71.1                |
|                                       | 3.69 (4H, $\text{CH}_2\text{C}$ , m)  | 69.9                                  | 3.57 (4H, $\text{CH}_2\text{C}$ , m)  | 71.1                |
|                                       | 3.18 (8H, $\text{CH}_2\text{N}$ , m)  | 47.6                                  | 3.06 (16H, $\text{CH}_2\text{N}$ , m) | 46.3                |
|                                       | 3.11 (8H, $\text{CH}_2\text{N}$ , m)  | 46.7                                  | 1.56 (8H, $\text{CH}_2\text{C}$ , m)  | 25.5                |
|                                       | 1.61 (8H, $\text{CH}_2\text{C}$ , m)  | 25.6                                  | 1.51 (16H, $\text{CH}_2\text{C}$ , m) | 26.9                |
| 1.57 (16H, $\text{CH}_2\text{C}$ , m) | 27.2                                  |                                       |                                       |                     |

**Table S4.**  $^1\text{H}$  NMR and  $^{13}\text{C}$  NMR data in  $\text{CD}_3\text{OD}$  and  $\text{CD}_3\text{CN}$  for uncomplexed ligand **L2** – and after adding silver ion with the Ag:L molar ratio 0.5:1, 1:1, 2:1, 3:1 and 4:1

|                    | Methanol                                         |                              | Acetonitrile                                     |                              |
|--------------------|--------------------------------------------------|------------------------------|--------------------------------------------------|------------------------------|
|                    | $^1\text{H}$ NMR                                 | $^{13}\text{C}$ NMR          | $^1\text{H}$ NMR                                 | $^{13}\text{C}$ NMR          |
| <b>L2</b>          | 4.37 (2H, $\text{P}(\text{CH}_2\text{O})_2$ , m) | 66.7                         | 4.34 (2H, $\text{P}(\text{CH}_2\text{O})_2$ , m) | 66.1                         |
|                    | 4.04 (2H, $\text{P}(\text{CH}_2\text{O})_2$ , m) | 66.7                         | 3.93 (2H, $\text{P}(\text{CH}_2\text{O})_2$ , m) | 66.1                         |
|                    | 4.33 (2H, $\text{CH}_2\text{OP}$ , m)            | 64.4                         | 4.26 (2H, $\text{CH}_2\text{OP}$ , m)            | 64.2                         |
|                    | 3.68 (2H, $\text{CH}_2\text{OP}$ , m)            | 64.4                         | 3.62 (2H, $\text{CH}_2\text{OP}$ , m)            | 64.2                         |
|                    | 3.74 (22H, $\text{CH}_2\text{C}$ , m)            | 71.8,71.7,71.5,<br>71.3,71.1 | 3.68 (22H, $\text{CH}_2\text{C}$ , m)            | 71.4,71.2,71.1,<br>70.9,70.5 |
|                    | 3.51 (2H, $\text{CH}_2\text{C}$ , m)             | 70.1                         | 3.45 (2H, $\text{CH}_2\text{C}$ , m)             | 69.7                         |
|                    | 3.14 (8H, $\text{CH}_2\text{N}$ , m)             | 46.6                         | 3.10 (8H, $\text{CH}_2\text{N}$ , m)             | 46.2                         |
|                    | 1.57 (4H, $\text{CH}_2\text{C}$ , m)             | 25.9                         | 1.54 (4H, $\text{CH}_2\text{C}$ , m)             | 25.6                         |
|                    | 1.53 (8H, $\text{CH}_2\text{C}$ , m)             | 27.2                         | 1.47 (8H, $\text{CH}_2\text{C}$ , m)             | 27.0                         |
| <b>L2 + 0.5 Ag</b> | 4.37 (2H, $\text{P}(\text{CH}_2\text{O})_2$ , m) | 66.9                         | 4.34 (2H, $\text{P}(\text{CH}_2\text{O})_2$ , m) | 66.9                         |
|                    | 4.07 (2H, $\text{P}(\text{CH}_2\text{O})_2$ , m) | 66.9                         | 4.06 (2H, $\text{P}(\text{CH}_2\text{O})_2$ , m) | 66.9                         |
|                    | 4.33 (2H, $\text{CH}_2\text{OP}$ , m)            | 64.6                         | 4.22 (2H, $\text{CH}_2\text{OP}$ , m)            | 64.9                         |
|                    | 3.75 (2H, $\text{CH}_2\text{OP}$ , m)            | 64.6                         | 3.69 (2H, $\text{CH}_2\text{OP}$ , m)            | 64.9                         |
|                    | 3.77 (22H, $\text{CH}_2\text{C}$ , m)            | 71.8,71.6,71.4,71.1          | 3.70 (22H, $\text{CH}_2\text{C}$ , m)            | 71.3,71.2,71.1,70.4          |
|                    | 3.52 (2H, $\text{CH}_2\text{C}$ , m)             | 70.2                         | 3.49 (2H, $\text{CH}_2\text{C}$ , m)             | 70.1                         |
|                    | 3.15 (8H, $\text{CH}_2\text{N}$ , m)             | 46.6                         | 3.11 (8H, $\text{CH}_2\text{N}$ , m)             | 46.2                         |
|                    | 1.58 (4H, $\text{CH}_2\text{C}$ , m)             | 25.9                         | 1.55 (4H, $\text{CH}_2\text{C}$ , m)             | 25.5                         |
|                    | 1.54 (8H, $\text{CH}_2\text{C}$ , m)             | 27.2                         | 1.49 (8H, $\text{CH}_2\text{C}$ , m)             | 26.9                         |
| <b>L2 + 1 Ag</b>   | 4.38 (2H, $\text{P}(\text{CH}_2\text{O})_2$ , m) | 67.1                         | 4.35 (2H, $\text{P}(\text{CH}_2\text{O})_2$ , m) | 67.7                         |
|                    | 4.10 (2H, $\text{P}(\text{CH}_2\text{O})_2$ , m) | 67.1                         | 4.17 (2H, $\text{P}(\text{CH}_2\text{O})_2$ , m) | 67.7                         |
|                    | 4.32 (2H, $\text{CH}_2\text{OP}$ , m)            | 64.8                         | 4.19 (2H, $\text{CH}_2\text{OP}$ , m)            | 65.6                         |
|                    | 3.82 (2H, $\text{CH}_2\text{OP}$ , m)            | 64.8                         | 3.82 (2H, $\text{CH}_2\text{OP}$ , m)            | 65.6                         |
|                    | 3.78 (22H, $\text{CH}_2\text{C}$ , m)            | 71.8,71.6,71.4,70.9          | 3.72 (22H, $\text{CH}_2\text{C}$ , m)            | 71.6,71.3,71.2,70.6          |
|                    | 3.57 (2H, $\text{CH}_2\text{C}$ , m)             | 70.2                         | 3.54 (2H, $\text{CH}_2\text{C}$ , m)             | 70.3                         |
|                    | 3.16 (8H, $\text{CH}_2\text{N}$ , m)             | 46.6                         | 3.11 (8H, $\text{CH}_2\text{N}$ , m)             | 46.3                         |
|                    | 1.59 (4H, $\text{CH}_2\text{C}$ , m)             | 25.8                         | 1.56 (4H, $\text{CH}_2\text{C}$ , m)             | 25.4                         |
|                    | 1.55 (8H, $\text{CH}_2\text{C}$ , m)             | 27.2                         | 1.50 (8H, $\text{CH}_2\text{C}$ , m)             | 26.9                         |
| <b>L2 + 2 Ag</b>   | 4.41 (2H, $\text{P}(\text{CH}_2\text{O})_2$ , m) | 68.6                         | 4.35 (2H, $\text{P}(\text{CH}_2\text{O})_2$ , m) | 68.2                         |
|                    | 4.29 (2H, $\text{P}(\text{CH}_2\text{O})_2$ , m) | 68.6                         | 4.22 (2H, $\text{P}(\text{CH}_2\text{O})_2$ , m) | 68.2                         |
|                    | 4.30 (2H, $\text{CH}_2\text{OP}$ , m)            | 66.4                         | 4.19 (2H, $\text{CH}_2\text{OP}$ , m)            | 66.2                         |
|                    | 3.94 (2H, $\text{CH}_2\text{OP}$ , m)            | 66.4                         | 3.90 (2H, $\text{CH}_2\text{OP}$ , m)            | 66.2                         |
|                    | 3.79 (22H, $\text{CH}_2\text{C}$ , m)            | 72.1,71.8,71.7,71.0          | 3.71 (22H, $\text{CH}_2\text{C}$ , m)            | 71.6,71.4,71.2,70.7          |
|                    | 3.65 (2H, $\text{CH}_2\text{C}$ , m)             | 70.8                         | 3.58 (2H, $\text{CH}_2\text{C}$ , m)             | 70.4                         |
|                    | 3.18 (8H, $\text{CH}_2\text{N}$ , m)             | 46.8                         | 3.12 (8H, $\text{CH}_2\text{N}$ , m)             | 46.4                         |
|                    | 1.60 (4H, $\text{CH}_2\text{C}$ , m)             | 25.6                         | 1.57 (4H, $\text{CH}_2\text{C}$ , m)             | 25.3                         |
|                    | 1.56 (8H, $\text{CH}_2\text{C}$ , m)             | 27.2                         | 1.51 (8H, $\text{CH}_2\text{C}$ , m)             | 26.9                         |
| <b>L2 + 3 Ag</b>   | 4.47 (2H, $\text{P}(\text{CH}_2\text{O})_2$ , m) | 69.5                         | 4.36 (2H, $\text{P}(\text{CH}_2\text{O})_2$ , m) | 68.6                         |
|                    | 4.40 (2H, $\text{P}(\text{CH}_2\text{O})_2$ , m) | 69.5                         | 4.28 (2H, $\text{P}(\text{CH}_2\text{O})_2$ , m) | 68.6                         |
|                    | 4.34 (2H, $\text{CH}_2\text{OP}$ , m)            | 67.4                         | 4.21 (2H, $\text{CH}_2\text{OP}$ , m)            | 66.6                         |
|                    | 4.06 (2H, $\text{CH}_2\text{OP}$ , m)            | 67.4                         | 3.95 (2H, $\text{CH}_2\text{OP}$ , m)            | 66.6                         |
|                    | 3.80 (22H, $\text{CH}_2\text{C}$ , m)            | 72.3,71.9,71.8,71.3          | 3.72 (22H, $\text{CH}_2\text{C}$ , m)            | 71.6,71.4,71.2,70.9          |
|                    | 3.70 (2H, $\text{CH}_2\text{C}$ , m)             | 70.9                         | 3.61 (2H, $\text{CH}_2\text{C}$ , m)             | 70.5                         |
|                    | 3.20 (8H, $\text{CH}_2\text{N}$ , m)             | 47.0                         | 3.14 (8H, $\text{CH}_2\text{N}$ , m)             | 46.5                         |
|                    | 1.62 (4H, $\text{CH}_2\text{C}$ , m)             | 25.5                         | 1.58 (4H, $\text{CH}_2\text{C}$ , m)             | 25.2                         |
|                    | 1.57 (8H, $\text{CH}_2\text{C}$ , m)             | 27.1                         | 1.52 (8H, $\text{CH}_2\text{C}$ , m)             | 26.8                         |
| <b>L2 + 4 Ag</b>   | 4.47 (2H, $\text{P}(\text{CH}_2\text{O})_2$ , m) | 69.7                         | 4.36 (2H, $\text{P}(\text{CH}_2\text{O})_2$ , m) | 68.7                         |
|                    | 4.43 (2H, $\text{P}(\text{CH}_2\text{O})_2$ , m) | 69.7                         | 4.30 (2H, $\text{P}(\text{CH}_2\text{O})_2$ , m) | 68.7                         |
|                    | 4.35 (2H, $\text{CH}_2\text{OP}$ , m)            | 67.7                         | 4.21 (2H, $\text{CH}_2\text{OP}$ , m)            | 66.7                         |
|                    | 4.10 (2H, $\text{CH}_2\text{OP}$ , m)            | 67.7                         | 3.96 (2H, $\text{CH}_2\text{OP}$ , m)            | 66.7                         |
|                    | 3.81 (22H, $\text{CH}_2\text{C}$ , m)            | 72.2,71.9,71.8,71.3          | 3.72 (22H, $\text{CH}_2\text{C}$ , m)            | 71.6,71.4,71.2,70.9          |
|                    | 3.71 (2H, $\text{CH}_2\text{C}$ , m)             | 70.9                         | 3.62 (2H, $\text{CH}_2\text{C}$ , m)             | 70.5                         |
|                    | 3.21 (8H, $\text{CH}_2\text{N}$ , m)             | 47.0                         | 3.14 (8H, $\text{CH}_2\text{N}$ , m)             | 46.5                         |
|                    | 1.63 (4H, $\text{CH}_2\text{C}$ , m)             | 25.4                         | 1.58 (4H, $\text{CH}_2\text{C}$ , m)             | 25.2                         |
|                    | 1.59 (8H, $\text{CH}_2\text{C}$ , m)             | 27.1                         | 1.52 (8H, $\text{CH}_2\text{C}$ , m)             | 26.8                         |

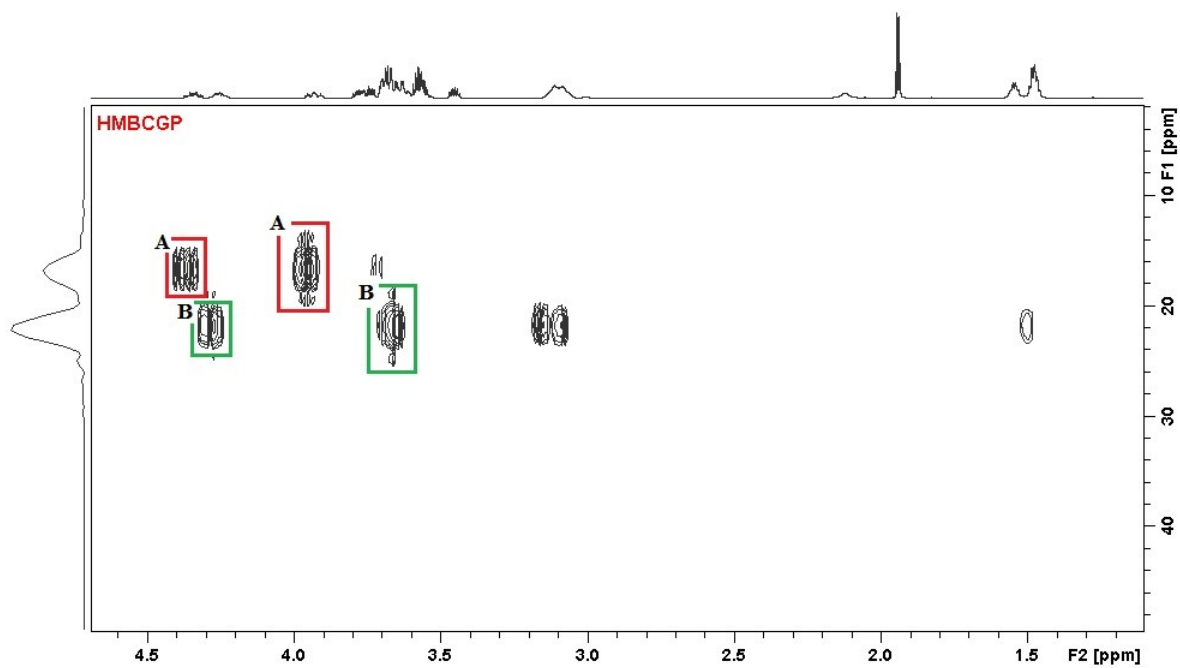

**Fig.S1**  $^1\text{H} - ^{31}\text{P}$  HMBC spectrum in  $\text{CD}_3\text{CN}$  for L2

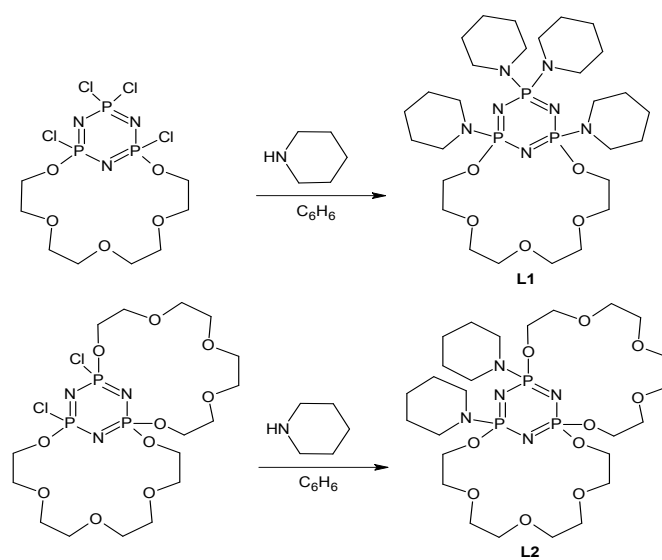

**Scheme S1** Syntheses of **L1** and **L2** ligands
